# Supplementary material for: Structural stability and the electronic properties of a (SiH)2O-formed siloxene sheet: a computational study
Source: Royal Society of Chemistry journal article supplement (doi:10.1039/c7cp03250a), 2017-01-01
Supplement: c7cp03250a1.pdf [file c7cp03250a1.pdf]

# Electronic Supplementary Information For

## Structural Stability and Electronic Properties of (SiH)<sub>2</sub>O-formed Siloxene Sheet: A Computational Study

Yanli Wang<sup>a</sup>, and Yi Ding<sup>b</sup>

a. Department of Physics, Center for Optoelectronics Materials and Devices, Zhejiang Sci-Tech University, Xiasha College Park, Hangzhou, Zhejiang 310018, People's Republic of China. E-mail: wangyanli-04@tsinghua.org.cn

b. Department of Physics, Hangzhou Normal University, Hangzhou, Zhejiang 310036, People's Republic of China. E-mail: dingyi2001@tsinghua.org.cn

### Contents:

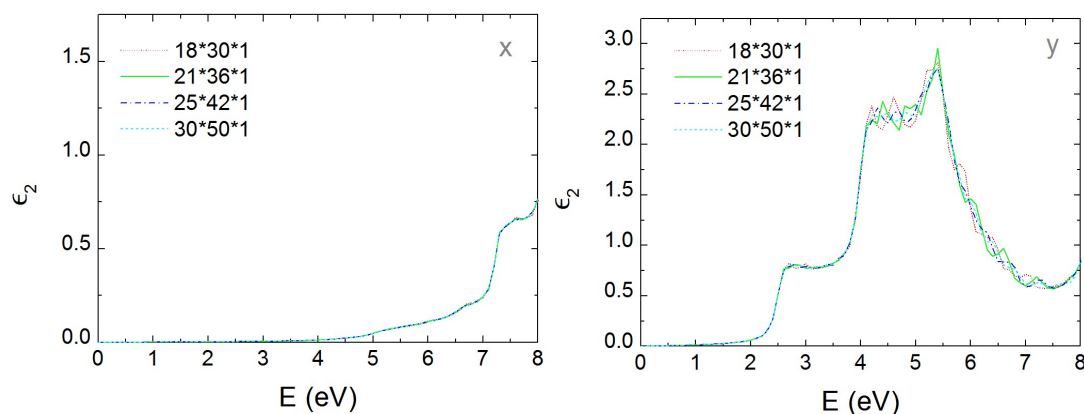

Figure S1: The convergence test for the imaginary part of dielectric function versus the k-point sampling.

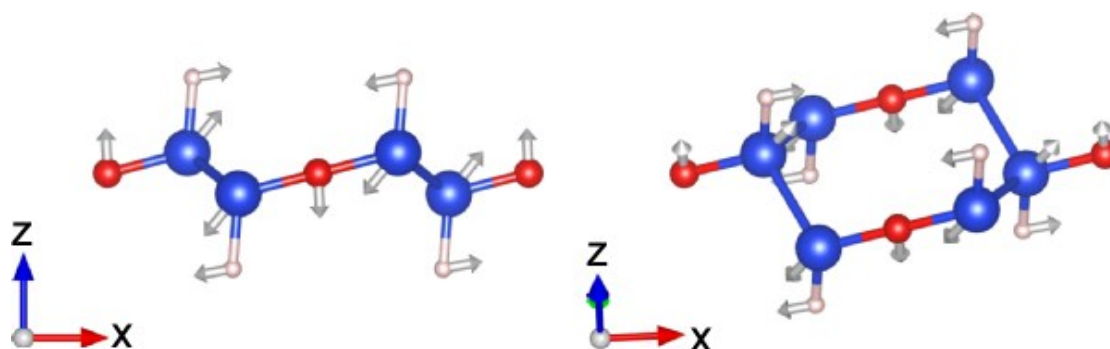

Figure S2: The pictures for the eigenvector of the lowest unstable mode at the  $\square$  point in the ideal (SiH)<sub>2</sub>O sheet. Arrows stand for the directions of atomic displacements.

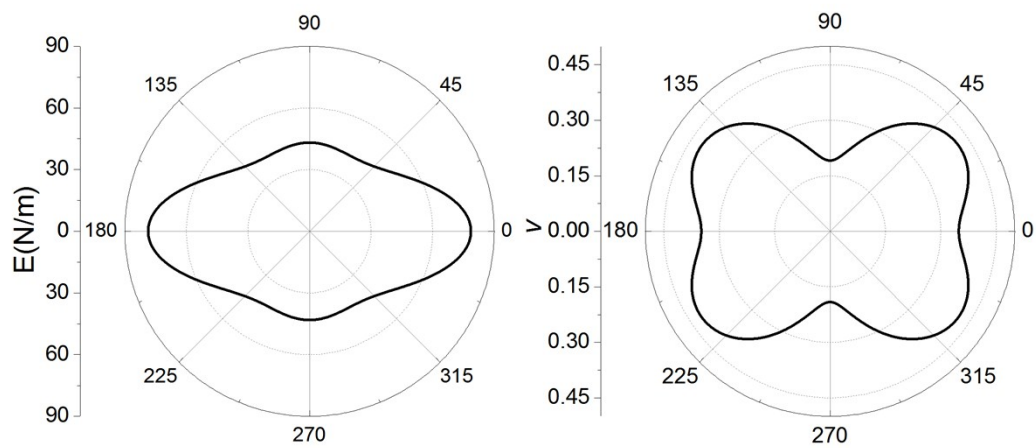

Figure S3: The orientation-dependent Young modulus and Poisson ratio for the ideal  $(\text{SiH})_2\text{O}$  sheet.
